# Supplementary material for: Accurate typing of short tandem repeats from genome-wide sequencing data and its applications
Source: HighWire-hosted journal article supplement (doi:10.1101/gr.185892.114), 2015-03-30
Supplement: Supplemental_Table_9.xlsx [file Supplemental_Table_9.xlsx]

## Sheet: Sheet1
Table S9: Number of reads for each motif and TR length in PCR+ analysis.
TR length is determined by TR length of major allele of that locus. Gray cells are loci that were used to make pseudo homozygous and pseudo heterozygous for validation.
	Mononucleotide TRs
	TR length	Motif
		A	G
	5	10047213	1355000
	6	2808335	193447
	7	1097576	22175
	8	370136	2972
	9	186160	647
	10	93346	49
	11	41449
	12	20336
	13	11509
	14	4283
	15	1074
	16	271
	17	19
	18	6
	Dinucleotide TRs
	TR length	Motif
		AC	AG	AT	CG
	6	1521439	1880822	1671933	4097
	7	513952	684838	595145	678
	8	134605	183381	195540	184
	9	60745	75554	52579	19
	10	21215	21776	18190	17
	11	15058	13891	8976	17
	12	6059	5645	4898	6
	13	5111	4511	2803
	14	3138	1913	2356
	15	2880	2445	1496
	16	1305	1101	924
	17	1324	888	640
	18	1315	557	404
	19	697	588	260
	20	682	215	114
	21	753	270	79
	22	531	88	76
	23	573	153	12
	24	426	104	11
	25	432	66
	26	292	46
	27	372	28
	28	225	16
	29	315	18
	30	133	9
	31	168	11
	32	129	5
	33	125
	34	40
	35	26
	36	13
	37	15
	38	5
	Trinucleotide TRs
	TR length	Motif
		AAC	AAG	AAT	ACC	ACG	ACT	AGC	AGG	ATC	CCG
	9	57212	104524	179183	46614	9465	20025	9579	57350	19837	135
	10	19552	31455	69106	14290	2865	6269	2897	21141	5964	11
	11	19003	11876	30381	5692	900	2284	948	8128	2346	24
	12	6246	3464	12002	1795	325	634	320	2964	789
	13	3406	1141	7170	1141	82	441	97	1209	386
	14	8450	928	5473	545	83	295	87	860	285	5
	15	2362	552	2527	308		118	13	320	165
	16	1377	189	1734	162		60	9	190	93	5
	17	3145	235	1327	107		71	26	225	149
	18	946	63	1025	23		58		147	51
	19	457	66	505	35		42			6
	20	1477	122	572	44		24		80	15
	21	329		371	5				9	15
	22	178	11	98	6				35	29
	23	539	33	167	11				27	25
	24	112		144			5		8	24
	25	60		123	7
	26	240		47	7				9	34
	27	45		33	10					9
	28	60		6	25					30
	29	77		65						8
	30	17		29						8
	31	39		9						11
	32	97		10
	33	15
	34									12
	35	56			5
	36									5
	37						8
	38	12		6
	41	6					6
	Tetranucleotide TRs
	TR length	Motif
		AAAC	AAAG	AAAT	AACC	AACG	AACT	AACG	AAGG	AAGT	AATC	AATG	AATT	ACAG	ACAT	ACCC	ACCG	ACCT	ACGC	ACGG	ACGT	ACTC	ACTG	AGAT	AGCC	AGCG	AGCT	AGGC	AGGG	AGTC	ATCC	ATCG	ATGC	CCCG	CCGG
	12	10192	12879	23143	1468	214	522	346	4943	2676	594	2293	2633	1406	4872	833		416	84	433	1119	2211	161	3118	236	23	272	87	3610	178	531	272	1119	13
	13	4917	6727	10045	590	135	142	83	2714	1438	205	1226	1086	964	3216	345		123	52	163	509	685	69	1216	109	19	89	19	1980	77	323	89	509
	14	4704	3707	6815	318	39	143	60	1388	940	88	678	1052	300	957	190		140		38	338	188	7	1084	17		108	16	1095	13	221	108	338
	15	12713	3865	8439	163	45	88	40	949	649	112	455	386	130	1052	60		69	63	44	16	151	14	869	14		49		624	12	58	49	16
	16	2415	1244	3104	102		16	21	616	305	20	222	393	102	588	12		41		7	66	91	15	508	8		19		159		78	19	66
	17	1431	751	2020	106		51		331	291	81	211	98	49	422	15		45		11	7			322			19		59		38	19	7
	18	1863	386	2044	18		7	9	362	181	23	104	104	30	239							17		159	12	9	19	7	43		12	19
	19	5257	1165	2957	34			7	204	55		79	105	88	239		8	18		6	27	24		258			44		60		19	44	27
	20	914	153	909	7		21		138	73		40	34	5	25			27				23		63					49		17
	21	615	186	713			27		149	8	13	33	12		79			19				13		84	18				12		44
	22	511	115	502	7				68	44	8	73	20		20			6						75			12				12	12
	23	2255	322	996	13		7		49	33		24		5	38							19		112	13				10		39
	24	331	82	385	16		11		27	18	19	16												107							11
	25	231	89	190	9				44	19		18	18							10				36							12
	26	175	29	186					8	8	7	15	25											113
	27	550	64	283					14	12		23	7		42			13						42			16				10	16
	28	196	36	167					14		9	5						7						58
	29	62	32	48					14	18			7		18			9						37
	30	67		46			5		12	12								7						16
	31	166	31	101	9				23	12					5									32
	32	64		28						11		17			5									24							6
	33	63	19	19						35	6	16												10
	34	21		25					11	9														43
	35	40	10	43						6								6						6
	36	55	11	16									12		6									14
	37	6		6											6									35
	38	8	16	5																				34
	39	10		21																				22							8
	40	7		5																				27							6
	41		5	10																				29
	42			6											14									30
	43								6															87
	44																							67
	45	7		6											9									20
	46																	5				8		15
	47																							28
	48																							26							7
	49																							13
	50																							11
	51														12
	52																							5
	53
	54																							6
