# Supplementary material for: Accurate typing of short tandem repeats from genome-wide sequencing data and its applications
Source: HighWire-hosted journal article supplement (doi:10.1101/gr.185892.114), 2015-03-30
Supplement: Supplemental_Table_10.xlsx [file Supplemental_Table_10.xlsx]

## Sheet: Sheet1
Table S10: Number of reads for each motif and TR length in PCR- analysis.
TR length is determined by TR length of major allele of that locus. Gray cells are loci that were used to make pseudo homozygous and pseudo heterozygous for validation.
	Mononucleotide TR
	TR length	Motif
		A	G
	5	23075468	3520912
	6	6486361	496064
	7	2538664	61076
	8	857136	8181
	9	438495	2400
	10	221478	518
	11	98137	60
	12	47789
	13	25326
	14	9699
	15	2901
	16	545
	17	60
	18	17
	Dinucleotide TRs
	TR length	Motif
		AC	AG	AT	CG
	6	3561536	4471328	3855588	23142
	7	1204244	1609774	1388709	6087
	8	316272	434309	464002	1941
	9	140680	181080	127967	587
	10	49133	52121	46146	268
	11	33386	32994	23427	134
	12	14358	13433	13976	53
	13	12627	10263	8291	36
	14	7177	5081	6217	25
	15	6573	6409	5063
	16	3032	2797	2832
	17	2924	2268	2354
	18	2683	1490	1666
	19	1617	1562	972
	20	1493	779	845
	21	2016	799	479
	22	1340	345	486
	23	1356	439	265
	24	1166	286	308
	25	1104	171	245
	26	759	163	100
	27	939	139	65
	28	679	120	63
	29	979	82	77
	30	675	71	25
	31	820	108	5
	32	632	41	12
	33	456	31	16
	34	498	14	5
	35	377
	36	354	11
	37	222	37
	38	106	14
	39	103	11
	40	87
	41	29
	42	21
	43	11
	44	6
	Trinucleotide TRs
	TR length	Motif
		AAC	AAG	AAT	ACC	ACG	ACT	AGC	AGG	ATC	CCG
	9	135316	242603	415536	137556	32844	46949	32077	144143	45667	3364
	10	45521	70915	159325	46900	11018	14674	10567	52794	13925	1368
	11	42878	27307	71062	17249	4078	5474	4002	21059	5201	1033
	12	14985	8455	28563	5854	1649	1661	1472	7763	1892	551
	13	8061	2774	18549	4118	586	1052	740	2819	771	226
	14	19946	2012	13201	1904	600	687	465	2219	733	255
	15	5703	1178	5985	875	196	305	173	961	330	191
	16	3344	383	4203	870	62	159	175	450	193	90
	17	7798	554	3602	362	121	218	177	604	262	49
	18	2501	228	2553	112	38	128	18	464	94	85
	19	1157	138	1466	73	46	115	131	11	8	40
	20	3959	235	1481	206	19	37	61	210	66	9
	21	957		987	34			19	58	38	34
	22	459	58	340	37	35	66		88	67	12
	23	1625	52	655	59		44	28	100	28
	24	381		548		49	46	6	29	63
	25	122		340		32		10			15
	26	801		353	22			12	31	69	12
	27	256		211	23						11
	28	229		61	52	6			11	83
	29	386		85						30
	30	90	5	201	19
	31	126		140		15				33	14
	32	229		117	33	15
	33	95		46						24
	34			100
	35	109		68	13		9	15			6
	36			38
	37	23		11			17
	38	44		44			11			22
	39	29		79						8
	40			36			11
	41	27		29			19
	42			17			13			13
	43	7		22
	44			9						10
	45			34
	46			43
	47			6
	48
	49			11
	50
	51
	52			7
	Tetranucleotide TRs
	TR length	Motif
		AAAC	AAAG	AAAT	AACC	AACG	AACT	AACG	AAGG	AAGT	AATC	AATG	AATT	ACAG	ACAT	ACCC	ACCG	ACCT	ACGC	ACGG	ACGT	ACTC	ACTG	AGAT	AGCC	AGCG	AGCT	AGGC	AGGG	AGTC	ATCC	ATCG	ATGC	CCCG	CCGG
	12	23688	29759	53503	3470	652	1300	757	11415	5961	1262	5310	6487	3732	11077	2517	589	1211	248	1521	2635	5151	519	7051	856	105	792	1181	9795	461	1017	792	2635	170	21
	13	10856	15663	25514	1259	389	468	249	6448	3279	393	2891	2728	2411	6939	1112	176	400	145	436	1067	1490	155	2736	354	38	290	329	5272	141	692	290	1067	68	29
	14	10897	8498	16953	716	124	344	189	3084	2023	171	1558	2747	662	2162	649	42	420		136	732	451	48	2623	60	15	264	172	2797	22	472	264	732	30	14
	15	28776	9496	21447	372	142	208	118	2219	1460	212	1066	876	379	2482	238	56	249	139	116	51	279	28	2130	71	34	184	72	1514	20	139	184	51	26	5
	16	5486	2547	8244	269		34	50	1304	626	23	627	997	223	1236	102	11	109	13	15	173	182	15	1165	54		54	67	431		144	54	173		26
	17	3290	1886	5036	217		124		787	512	155	515	300	74	954	60		80		51	31			806			43		349		111	43	31	6	14
	18	4033	885	5178	40		16	25	779	476	50	201	474	86	526			39				37		432	31	36	41	26	118	27	20	41
	19	12268	2534	8014	114		10	12	609	155		281	253	282	558		10	80		28	51	49		520			112	6	220		31	112	51
	20	2109	406	2352	27	12	51		311	174		77	93	44	52			66				30		196					130		46
	21	1246	351	1915			97		455	13	17	83	28		149			68				48		168	44			15	76		46
	22	1144	317	1869	18				220	79	18	122	72		67			19						231	22		47		43		18	47
	23	5590	797	3056	30	10	20		160	75		46	15	10	68			14				44		213	32	12			29		55
	24	801	155	1058	86		11		83	48	46	61	41		6			52						201					23		20
	25	553	149	659	27				46	56		34	56		35					6				79					8		23
	26	503	118	554			26		50	56	19	30	46					17						260					35
	27	1524	217	768			34		20	55		59	11		118			39						95			39		5		16	39
	28	450	94	396			25		32		6	15					8	23						61
	29	73	95	224			7		33	53	14		20					28						85
	30	31	12	283					19	38			7					9						109					8
	31	470	81	388	44				24	12		9	42		23			31						57
	32	160	21	140						10		22			10									50							8
	33	121	46	91						50		15												71					10
	34	16		191			10			13		17												74
	35	144	62	297						13														95
	36	119	42	174					9						19									93
	37		15	99	15							6						16						75
	38	94	34	91														7
	39			170					13									18						123							8
	40			86					25															107							12
	41	23		117																				55
	42			119					22						20									128
	43		12	95				6							8									154
	44			144																				121
	45	22	18	53					7						23									133
	46			96					6									8				13		133
	47			91					29					10	28									164
	48			17																				56
	49		9						7						9									36
	50			15														19						40
	51		16	5																				15
	52			28																				41
	53			8																				25
	54		5																					19
	55
	56																							7
	57
	58																							6
